# Supplementary material for: Pollution Characteristics and Risk Prediction of Endocrine Disruptors in Lakes of Wuhan
Source: MDPI journal article supplement (doi:10.3390/toxics10020093), 2022-02-18
Supplement: s1 [file s1]

# Supplementary Materials: Pollution Characteristics and Risk Prediction of Endocrine Disruptors in Lakes of Wuhan

Yurui Zhang, Jun Cao, Tan Ke, Yue Tao, Wanyin Wu, Panpan Wang, Min Zhou and Lanzhou Chen

**Table S1.** Basic information for each sampling site of the lakes.

| Sites | administrative region | Location        | area (hm <sup>2</sup> ) | Sampling number |
|-------|-----------------------|-----------------|-------------------------|-----------------|
| JLL   | Dongxihu District     | E114.07, N30.75 | 95.8                    | 4               |
| SXS   | Dongxihu District     | E114.14, N30.75 | 23.3                    | 1               |
| XMSL  | Dongxihu District     | E114.22, N30.66 | 15.8                    | 1               |
| LWG   | Dongxihu District     | E114.13, N30.73 | 18.2                    | 1               |
| LYL   | Dongxihu District     | E114.19, N30.56 | 168                     | 3               |
| HJL   | Hanyang District      | E114.29, N30.44 | 811.8                   | 6               |
| XGLL  | Caidian District      | E114.06, N30.37 | 29                      | 3               |
| ZSL   | Hannan District       | E114.13, N30.45 | 446                     | 5               |
| BL    | Jiangnan District     | E114.52, N30.61 | 9.4                     | 2               |
| SJL   | Jingjikaifa District  | E114.18, N30.53 | 239.1                   | 4               |
| BTZL  | Caidian District      | E114.20, N30.52 | 52.4                    | 3               |
| KZL   | Jiangxia District     | E114.23, N30.03 | 725.1                   | 7               |

**Table S2.** Mass spectrometric parameters and retention time.

| Compound            | Retention time, min | Precursor ion, m/z | Product ion m/z | Collision Energy, V | ESI Mode |
|---------------------|---------------------|--------------------|-----------------|---------------------|----------|
| E <sub>3</sub>      | 1.575               | 287.2              | 171*/143        | 38/38               | ESI-     |
| E <sub>1</sub>      | 5.622               | 269.1              | 145.1*/183      | 33/38               | ESI-     |
| β-E <sub>2</sub>    | 5.150               | 271.2              | 145.1*/183      | 40/40               | ESI-     |
| 17α-EE <sub>2</sub> | 5.468               | 295.2              | 260.9*/183      | 17/33               | ESI-     |
| BPA                 | 4.970               | 227.1              | 212.1*/133.1    | 16/24               | ESI-     |

**Table S3.** The method validation parameters of EDCs in surface water samples.

| Analyte             | R <sup>2</sup> | Recoveries (spiked at 50 ng L <sup>-1</sup> ) | RSD <sup>a</sup> (%) | LOD ng/L |
|---------------------|----------------|-----------------------------------------------|----------------------|----------|
| E <sub>1</sub>      | 0.999          | 86.2                                          | 8.7                  | 0.2      |
| E <sub>2</sub>      | 0.996          | 86.67                                         | 11.6                 | 1.1      |
| E <sub>3</sub>      | 0.998          | 108.7                                         | 10.4                 | 1.2      |
| 17α-EE <sub>2</sub> | 0.999          | 73.94                                         | 14.8                 | 1.8      |
| BPA                 | 0.998          | 74.23                                         | 9.3                  | 1.0      |

**Table S4.** ECOSAR data of target environmental hormone and PNEC calculation.

| Compound                     | Class       | Time | LC50/EC50<br>(mg/L) | Assessment<br>factor | PNEC<br>(ng/L) |
|------------------------------|-------------|------|---------------------|----------------------|----------------|
| E <sub>1</sub>               | fish        | 96   | 3.834               | 1000                 | 3834           |
|                              | daphnid     | 48   | 2.184               | 1000                 | 2184           |
|                              | green algae | 96   | 8.74                | 1000                 | 8740           |
|                              | fish        | chv  | 0.477               | 100                  | 4770           |
|                              | daphnid     | chv  | 0.415               | 100                  | 4150           |
|                              | green algae | chv  | 4.032               | 100                  | 40320          |
| BPA                          | fish        | 96   | 1.284               | 1000                 | 1284           |
|                              | daphnid     | 48   | 5.237               | 1000                 | 5237           |
|                              | green algae | 96   | 1.331               | 1000                 | 1331           |
|                              | fish        | chv  | 0.55                | 100                  | 5500           |
|                              | daphnid     | chv  | 1.773               | 100                  | 17730          |
|                              | green algae | chv  | 0.227               | 100                  | 2270           |
| E <sub>3</sub>               | fish        | 96   | 12.115              | 1000                 | 12115          |
|                              | daphnid     | 48   | 5.235               | 1000                 | 5235           |
|                              | green algae | 96   | 22.252              | 1000                 | 22252          |
|                              | fish        | chv  | 1.377               | 100                  | 13770          |
|                              | daphnid     | chv  | 0.995               | 100                  | 9950           |
|                              | green algae | chv  | 10.347              | 100                  | 103470         |
| 17 $\alpha$ -EE <sub>2</sub> | fish        | 96   | 1.269               | 1000                 | 1269           |
|                              | daphnid     | 48   | 0.98                | 1000                 | 980            |
|                              | green algae | 96   | 3.671               | 1000                 | 3671           |
|                              | fish        | chv  | 0.175               | 100                  | 1750           |
|                              | daphnid     | chv  | 0.186               | 100                  | 1860           |
|                              | green algae | chv  | 1.679               | 100                  | 16790          |
| B- E <sub>2</sub>            | fish        | 96   | 1.578               | 1000                 | 1578           |
|                              | daphnid     | 48   | 1.129               | 1000                 | 1129           |
|                              | green algae | 96   | 4.299               | 1000                 | 4299           |
|                              | fish        | chv  | 0.212               | 100                  | 2120           |
|                              | daphnid     | chv  | 0.214               | 100                  | 2140           |
|                              | green algae | chv  | 1.97                | 100                  | 19700          |

**Table S5.** The main detected EDCs and its information.

| Compound | Formula                                        | Molecular Mass,<br>g/mol | Chemical structure                                                                   | CAS number |
|----------|------------------------------------------------|--------------------------|--------------------------------------------------------------------------------------|------------|
| E1       | C <sub>18</sub> H <sub>22</sub> O <sub>2</sub> | 270.37                   | 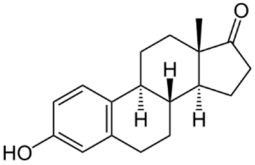  | 53-16-7    |
| E2       | C <sub>18</sub> H <sub>24</sub> O <sub>2</sub> | 272.38                   |   | 50-28-2    |
| E3       | C <sub>18</sub> H <sub>24</sub> O <sub>3</sub> | 288.38                   |   | 50-27-1    |
| 17α-EE2  | C <sub>20</sub> H <sub>24</sub> O <sub>2</sub> | 296.40                   |   | 57-62-6    |
| BPA      | C <sub>15</sub> H <sub>16</sub> O <sub>2</sub> | 228.29                   |  | 80-05-7    |

**Table S6.** Values of EDCs in the samples.

| Analyte | E1<br>ng/L | BPA<br>ng/L | E3<br>ng/L | 17a-EE2<br>ng/L | $\beta$ -E2<br>ng/L |
|---------|------------|-------------|------------|-----------------|---------------------|
| JLL     | 0.29       | 71          | 73.11      | 170.47          | 3.16                |
| SXS     | 0.37       | 75.86       | 20.47      | 188.2           | 3.42                |
| XMSL    | 0.32       | 0           | 60.96      | 176.51          | 3.7                 |
| HJL     | 0.31       | 63.13       | 28.75      | 132.07          | 3.84                |
| XGLL    | 0.77       | 64.63       | 64.86      | 70.95           | 3.01                |
| ZSL     | 0.31       | 95.19       | 18.03      | 95.86           | 3.74                |
| BL      | 0.62       | 23.46       | 40.98      | 94.54           | 4.12                |
| LWG     | 0.71       | 23.13       | 72.51      | 60.18           | 3.6                 |
| LYL     | 0.44       | 21.14       | 12.61      | 0               | 3.18                |
| SJL     | 0.7        | 0           | 13.78      | 11.76           | 4.82                |
| KZL     | 0.44       | 5.58        | 8.15       | 13.47           | 0.4                 |
| BTZL    | 0.41       | 6           | 14.05      | 3.15            | 3.22                |

**Table S7.** Key environmental parameters of sampling water from twelve lakes in Wuhan City.

| Sampling site | T (°C) | pH   | DO (mg/L) | $\sigma$ mg/L | NH3-N mg/L | TP mg/L | TN mg/L | NO3-N mg/L | Pi $\mu$ S/cm |
|---------------|--------|------|-----------|---------------|------------|---------|---------|------------|---------------|
| JLL           | 20.60  | 7.66 | 8.20      | 3.97          | 0.44       | 0.09    | 1.20    | 0.34       | 2.57          |
| SXS           | 21.20  | 7.46 | 7.80      | 6.80          | 1.05       | 0.27    | 2.59    | 0.90       | 2.55          |
| XMSL          | 20.18  | 7.53 | 8.20      | 3.40          | 0.56       | 0.17    | 1.60    | 0.49       | 2.55          |
| HJL           | 25.76  | 8.53 | 10.27     | 5.29          | 0.48       | 0.14    | 0.92    | 0.09       | 2.56          |
| XGLL          | 23.13  | 7.91 | 8.88      | 5.00          | 0.65       | 0.16    | 1.58    | 0.39       | 2.54          |
| ZSL           | 22.95  | 8.59 | 11.92     | 4.58          | 0.48       | 0.14    | 1.25    | 0.14       | 2.48          |
| BL            | 19.23  | 7.51 | 7.93      | 3.98          | 0.45       | 0.24    | 1.28    | 0.32       | 2.48          |
| LWG           | 23.40  | 7.47 | 7.68      | 7.13          | 0.66       | 0.47    | 1.76    | 0.33       | 2.59          |
| LYL           | 28.68  | 7.03 | 4.18      | 8.27          | 12.27      | 0.98    | 15.92   | 1.38       | 2.86          |
| SJL           | 25.95  | 8.60 | 9.66      | 6.25          | 1.63       | 0.20    | 2.54    | 0.16       | 2.59          |
| KZL           | 26.68  | 9.03 | 13.49     | 6.67          | 0.32       | 0.13    | 0.83    | 1.03       | 2.40          |
| BTZL          | 25.40  | 9.83 | 12.92     | 9.76          | 0.71       | 0.26    | 2.75    | 0.10       | 2.51          |

**Table S8.** Summary of the forward selection procedure in the redundancy analysis (RDA) performing the data from the water samples.

| Environmental variable  | Abbreviation       | $\lambda$ (%) <sup>a</sup> | $p$ <sup>b</sup> | F   |
|-------------------------|--------------------|----------------------------|------------------|-----|
| Water temperature       | T                  | 35.6                       | 0.008            | 5.5 |
| Electrical conductivity | Pi                 | 3.9                        | 0.582            | 0.5 |
| Permanganate index      | $\sigma$           | 4.4                        | 0.4              | 0.4 |
| pH                      | pH                 | 7.5                        | 0.012            | 1.2 |
| Dissolved oxygen        | DO                 | 10                         | 0.003            | 7.7 |
| Ammonia nitrogen        | NH <sub>3</sub> -N | 0.8                        | 0.942            | 0.1 |
| Total phosphorus        | TP                 | 16.5                       | 0.218            | 2.3 |
| Total nitrogen          | TN                 | 6.1                        | 0.37             | 0.9 |
| Nitrate nitrogen        | NO <sub>3</sub> -N | 1.9                        | 0.74             | 0.2 |

$\lambda$  (%): the variation explained by the selected variables;  $p$ : significance of explained variation; The bold number means the significant level at  $p < 0.01$ ; Statistical significance was tested using Monte Carlo permutation test with 499 permutations.

**Table S9.** Eigen values for RDA and correlation coefficients between environmental factors and RDA ordination axes.

| Axes                             | 1     | 2     |
|----------------------------------|-------|-------|
| Eigenvalues                      | 0.622 | 0.309 |
| Species-environment correlations | 0.461 | 0.815 |
| of species data                  | 8.39  | 2.50  |
| of species-environment relation  | 62.19 | 93.13 |
